# Supplementary material
Source: PubMed Central journal article supplement (PMC5637730)

# Enrollment Data

## Connection Program Consort Chart – All Sites As of 5/31/2013

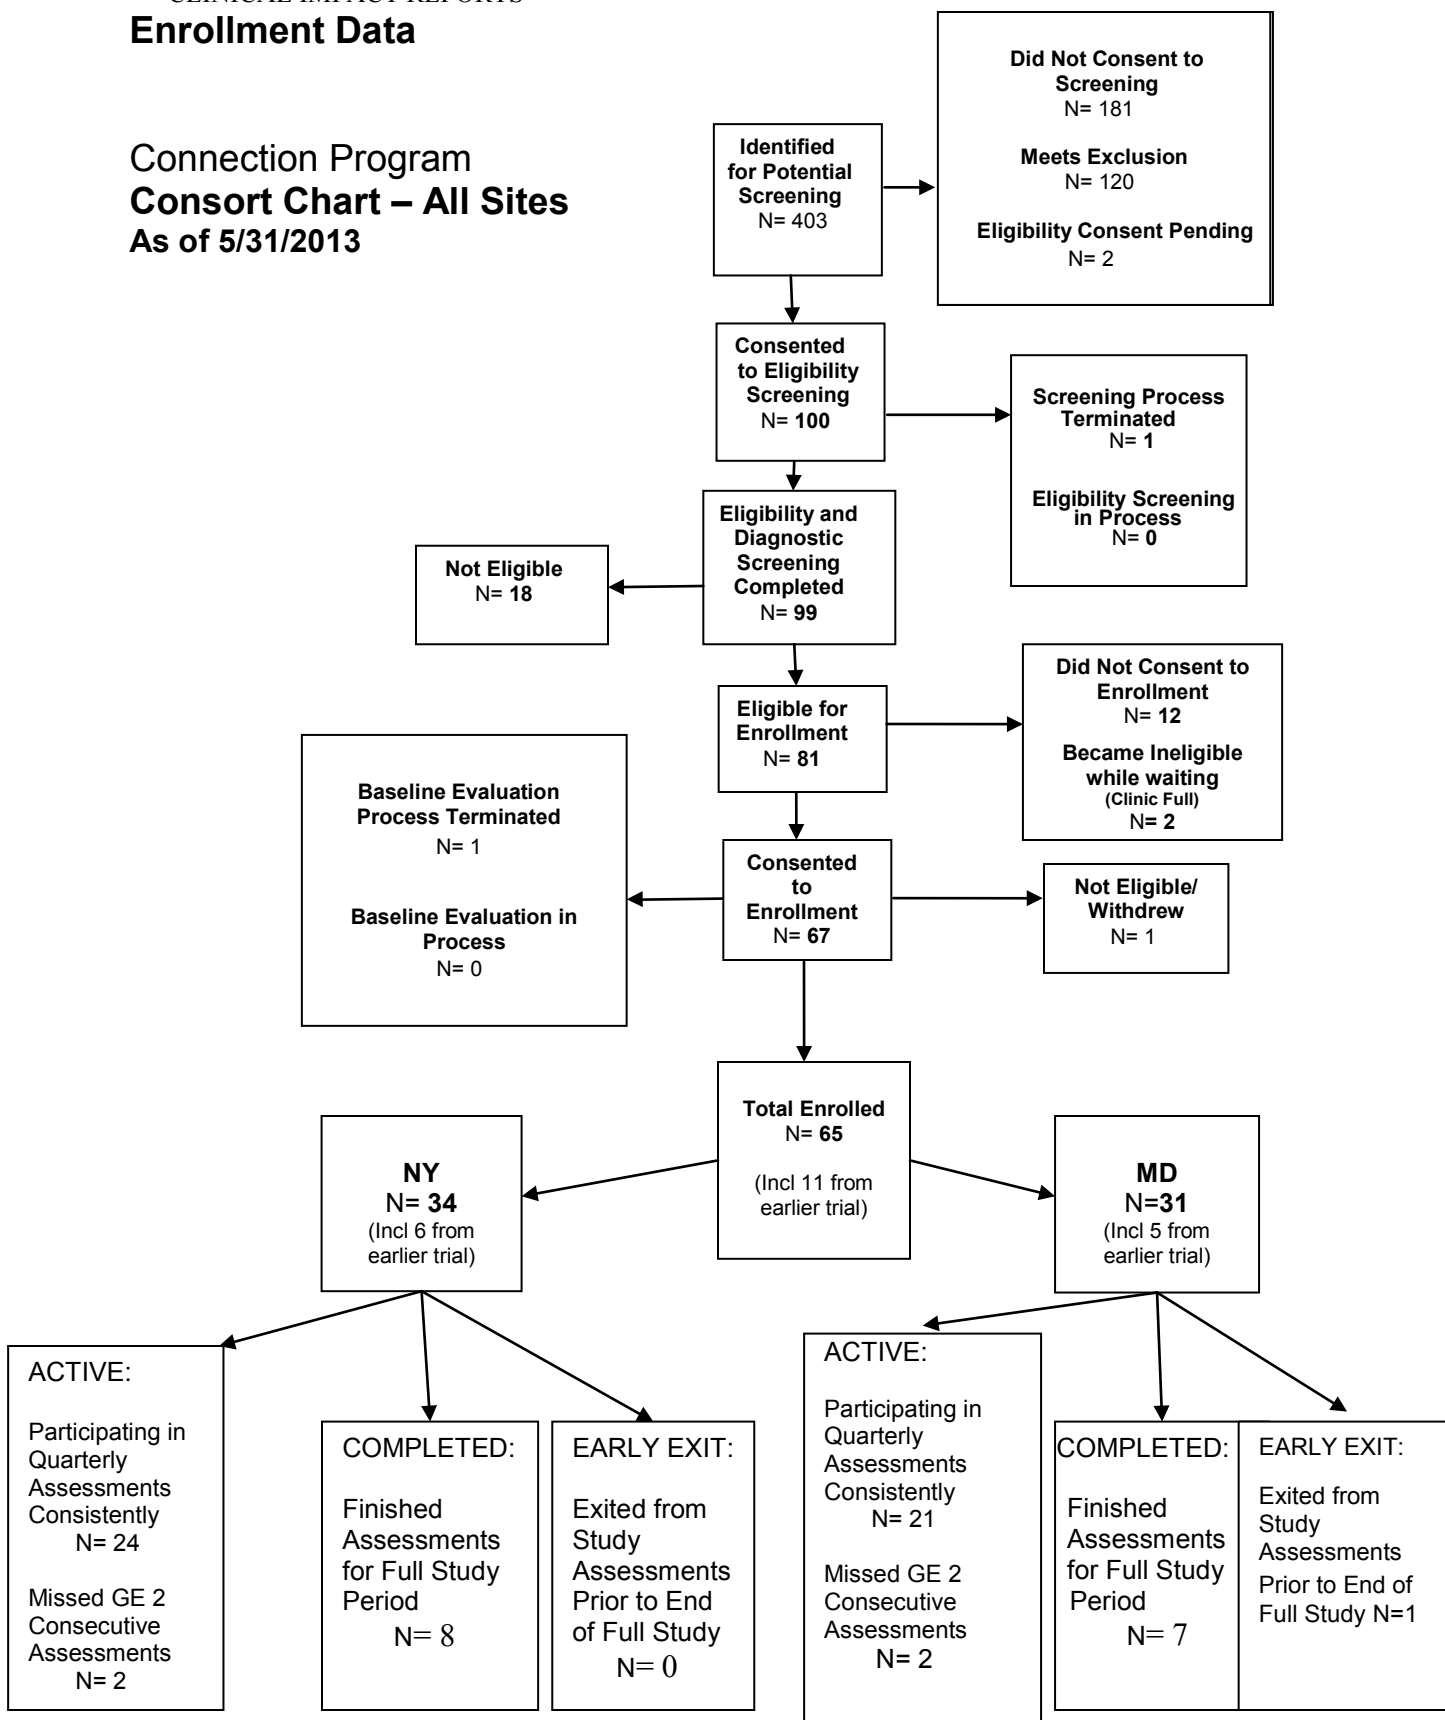

Supplement: NIHMS692509-supplement-Data_Supplement_1.pdf [file NIHMS692509-supplement-Data_Supplement_1.pdf]
